# Supplementary material
Source: MDPI journal article supplement (https://www.mdpi.com/2410-3888/7/6/320)
Supplement: s1 [file s1]

| Date      | Haul | Time  | Lat_START | Long_START | Lat_END   | Long_END   | Depth (m) |
|-----------|------|-------|-----------|------------|-----------|------------|-----------|
| 29/4/2011 | 1    | Night | 45°09,678 | 12°21,233  | 45°09,401 | 12°21,256  | 12        |
| 29/4/2011 | 2    | Night | 45°09,954 | 12°24,870  | 45°10,196 | 12°32,727  | 22,7      |
| 29/4/2011 | 3    | Day   | 45°10,226 | 12°32,577  | 45°10,780 | 12°24,971  | 23        |
| 29/4/2011 | 4    | Day   | nd        | nd         | 45°08,328 | 12°20,835  | 9         |
| 10/5/2011 | 1    | Night | 45°09,600 | 12°21,129  | 45°09,288 | 12°21,285  | 11,7      |
| 10/5/2011 | 2    | Dawn  | 45°09,44  | 12°26,085  | 45°09,4   | 12°25,06   | nd        |
| 10/5/2011 | 3    | Day   | 45°09,031 | 12°21,198  | 45°09,440 | 12°21,318  | 11        |
| 15/5/2011 | 1    | Night | 45°11,748 | 12°27,350  | 45°09,201 | 12°27,082  | 25        |
| 15/5/2011 | 2    | Dawn  | 45°09,327 | 12°21,204  | 45°10,160 | 12°21,062  | 9,6       |
| 15/5/2011 | 3    | Day   | 45°10,170 | 12°24,311  | 45°12,357 | 12°26,922  | 20        |
| 15/5/2011 | 4    | Day   | nd        | nd         | nd        | nd         | 21        |
| 18/5/2011 | 1    | Night | 45°12,293 | 12°27,264  | 45°09,442 | 12°26,505  | 24        |
| 18/5/2011 | 2    | Dawn  | 45°09,096 | 12°21,115  | 45°09,437 | 12°21,250  | 11        |
| 18/5/2011 | 3    | Day   | 45°13,142 | 12°25,244  | 45°18,691 | 12°26,521  | 21        |
| 18/5/2011 | 4    | Day   | 45°18,584 | 12°26,502  | 45°12,803 | 12°25,215  | 19        |
| 28/5/2011 | 1    | Night | 45°09,22  | 12°21,16   | 45°06,935 | 12°21,36   | 11,5      |
| 28/5/2011 | 2    | Night | 45°07,653 | 12°21,253  | 45°06,51  | 12°21,389  | 11        |
| 28/5/2011 | 3    | Dawn  | 45°09,20  | 12°27,08   | 45°13,055 | 12°25,055  | nd        |
| 28/5/2011 | 4    | Day   | 45°09,321 | 12°21,261  | 45°06,061 | 12°21,612  | 12        |
| 28/5/2011 | 5    | Day   | 45°06,295 | 12°21,408  | 45°09,700 | 12°21,171' | 12        |

| Shore_Dist (M) |
|----------------|
| 0,7            |
| 7,1            |
| > 7            |
| 0,7            |
| 0,6            |
| 7              |
| 1              |
| 6,7            |
| 1              |
| 4,6            |
| > 3            |
| 6              |
| 1              |
| 5              |
| > 3            |
| 1,1            |
| 1,5            |
| 5              |
| 0,9            |
| 1,2            |
